# 1 Microbial Community Structure and Diversity of Shrimp 2 Paste at Different Fermentation Stages

3 DAI Lingying<sup>1,2</sup>, WANG Limei<sup>1</sup>, SUN Jiang<sup>1</sup>, ZHENG Lixue<sup>1</sup>, QI Bin<sup>1,#</sup>

4 (1. College of Biology and Food Engineering, Changshu Institute of Technology, Changshu 215500, China ;

5 2. School of Food Science and Technology, Jiangnan University, Wuxi 214122,China;)

6 #Corresponding author: QI Bin

7 College of Biology and Food Engineering, Changshu Institute of Technology, Changshu

8 215500,China Tel:13616235465 ; Email: qibin@cslg.edu.cn

## 9 **Abstract**

10 High-throughput sequencing was used to reveal the highly diverse bacterial  
11 populations in shrimp paste at different fermentation stages. We studied three stages of  
12 fermentation and obtained 448,916 reads. Using this approach, we revealed the presence  
13 of 30 phyla, 55 classes, 86 orders, 206 families and 695 genera of bacteria in the shrimp  
14 paste. Shrimp paste in fermentation metaphase had a more diverse microbiota than that in  
15 fermentation prophase and fermentation anaphase. Diversity appeared greatest in  
16 fermentation anaphase. The four dominant phyla were *Proteobacteria*, *Firmicutes*,  
17 *Actinobacteria*, and *Bacteroidetes*. The most common genera were *Psychrobacter*,  
18 *Halomonas*, *Bacillus*, *Alteribacillus*, and *Lactococcus*. Their content varied at different  
19 stages of fermentation. All the microbiome presented a variety of changes in the  
20 microbial diversity of shrimp paste.

## 21 **Importance**

22 Most research on the microbial diversity of shrimp paste has focused on the shrimp  
23 culture environment, or the chemical composition and sensory attributes of the paste.

24 Little research has been conducted on the microbial diversity and composition of shrimp  
25 paste. The relationship between microbes and the flavor and quality of shrimp paste has  
26 thus been unknown. We therefore analyzed the microbial composition and variation of  
27 shrimp paste at different stages of fermentation. The dominant bacteria in fermentation  
28 prophase, metaphase, and anaphase were identified. Our preliminary findings give some  
29 insight into which microbes contribute to the flavor of shrimp paste and suggest how to  
30 improve its flavor. In addition, our findings are relevant to optimizing the production of  
31 shrimp paste and guaranteeing its quality and safety.

## 32 **Introduction**

33 Shrimp paste is widely consumed as a condiment and used as an ingredient  
34 throughout China and the south-east Asian region (1-2) .It is normally produced by  
35 fermenting small shrimp (*Acetes vulgaris*) with salt at a ratio of 5:1 (shrimp to salt, w/w).  
36 The mixture is thoroughly blended or homogenized before being compacted in a  
37 container. Shrimp paste is rich in protein, calcium, carotenoids, and chitin (3-4). It  
38 exhibits anti-oxidant activity (5), lowers cholesterol and blood pressure, and enhances the  
39 body's immune response and other biological activity (6). It thus has great potential as a  
40 functional food. Shrimp paste produced using different fermentation technologies has  
41 different fermentation cycles. Some pastes are fermented for 3-6 months (7), some for 2  
42 months (8) and some for only 1 month, which is traditional in China (9). We took 1  
43 month as a study period, and divided it into three fermentation stages: prophase,  
44 metaphase, and anaphase, each of which was 10 days long.

45 High-throughput sequencing allows the simultaneous sequencing of millions of  
46 DNA molecules, providing detailed and comprehensive analysis of the transcriptome and  
47 genome of species (10). Compared to traditional sequencing methods, such as the  
48 analysis of 16S rRNA genes through denaturing or temperature gradient gel  
49 electrophoresis (DGGE/TGGE) (11), single-stranded conformation polymorphisms  
50 (SSCP) (12) and Sanger sequencing (13), high-throughput sequencing has been widely  
51 used in the analysis of the microbial populations of many fermented foods, including Fen  
52 liquor, cheese, and kefir grains (14-17) due to its advantages of high read length, high  
53 accuracy, high throughput, and unbiasedness (18).

54 Naturally fermented seafood usually contains microorganisms related to the raw  
55 materials and the growth environment of the seafood (19). Bacteria are the main  
56 microorganisms responsible for seafood fermentation. Research on the microbial  
57 diversity of shrimp paste has mostly concentrated on the culture environment of shrimp  
58 (20-22) and the chemical composition and sensory attributes of shrimp paste (23). There  
59 has been little research into the microbial community structure and diversity in shrimp  
60 paste. Studying the microbial diversity at different stages of the fermentation of shrimp  
61 paste is of great significance for the dissemination of shrimp paste knowledge, the  
62 predictability of the flavor of shrimp paste, and the control of shrimp paste production.

## 63 **RESULTS**

### 64 **Sequencing and bioinformatic analysis.**

65 DNA was extracted from shrimp paste at 11 stages of fermentation. Following total

66 genomic DNA extraction, amplicons of V3-V4 16S rRNA genes were generated, and  
67 448,916 reads were obtained through high-throughput sequencing, corresponding to  
68 153,766 reads from fermentation prophase, 169,915 reads from fermentation metaphase  
69 and 125,235 reads from fermentation anaphase. Species diversity and richness were  
70 calculated for each time point (Table 1). ACE values and Chao1 values reflect  
71 community richness. Shannon values, Simpson values, and coverage values reflect  
72 community diversity. Shrimp paste in fermentation prophase had a less diverse  
73 microbiota than that in fermentation metaphase. Diversity appeared greatest in Stage 9 in  
74 late fermentation, but it reduced again in the next stage.

## 75 **Microbial composition of shrimp paste as revealed by high-throughput** 76 **sequencing**

77 Phylogenetic assignment (Fig. 1) of high-throughput sequence data revealed the  
78 presence of bacteria mainly corresponding to four phyla: *Proteobacteria*, *Firmicutes*,  
79 *Actinobacteria*, and *Bacteroidetes*. As can be seen in Figure 1, *Proteobacteria* was  
80 dominant in the fermenting shrimp paste, reaching 55.59%. The content of *Firmicutes*  
81 was slightly lower than that of *Proteobacteria*, accounting for 35.3%. *Actinobacteria* and  
82 *Bacteroidetes* were present at the lowest levels (3.09% and 4.89%, respectively).

83 The proportion of *Proteobacteria* in the fermentation prophase was higher than in  
84 metaphase and anaphase. *Firmicutes* was most abundant in the metaphase stage, and  
85 present at the lowest levels in the prophase stage. *Bacteroidetes* showed a gradually  
86 decreasing trend across the three stages. The content of *Actinobacteria* and

87 *Verrucomicrobia* differed little across the three stages. *Planctomycetes* and *Fusobacteria*  
88 were more abundant in the fermentation prophase than in metaphase or anaphase, and  
89 were present at extremely low levels in late fermentation (Table 2).

90 At the genus level, *Psychrobacter* was the dominant microorganism, accounting for  
91 23.78%, followed by *Halomonas* at 9.46% (Fig. 1). During the whole fermentation  
92 process, levels of *Psychrobacter* decreased (Fig.2), and the proportion of *Psychrobacter*  
93 was greater in fermentation prophase than in metaphase or anaphase (Table 2).  
94 *Halomonas* was not found in Stage 1 to Stage 4, but began to appear in Stage5, and  
95 gradually increased and stabilized (Fig. 2). This growth pattern may be related to the salt  
96 concentration of the shrimp paste during fermentation. Levels of *Bacillus* slowly  
97 increased from Stage 1 to Stage 3, began to decrease at Stage 4 and then remained  
98 essentially unchanged (Fig. 2). In general, *Bacillus* was most abundant in the  
99 pre-fermentation period (Table 2). *Alteribacillus* began to appear at a low level at Stage 2,  
100 gradually increased to Stage 8, then gradually reduced (Fig. 2). Its content was highest in  
101 fermentation metaphase than in the other two periods (Table 2). *Lactococcus* began to  
102 reduce after Stage 3 and then remained unchanged. After Stage 9 it decreased  
103 significantly (Fig. 2). The proportion of *Lactococcus* declined across the three  
104 fermentation phases (Table 2). *Carnobacterium* had the highest content mid-fermentation.  
105 *Marinobacter* levels were extremely low in the early stage of fermentation, and increased  
106 over time. *Salinicoccus*, *Chromohalobacter*, *Salimicrobium*, *Allobacillus*, and  
107 *Tetragenococcus* were almost nonexistent at the early stage and began to appear in the

108 middle and late stage. There was little change in the content of *Oceanisphaera*, *Kocuria*,  
109 *Pseudomonas*, *Pseudoalteromonas*, and *Aliivibrio* in the three stages. The proportions of  
110 *Tissierella*, *Photobacterium*, *Gelidibacter*, *Pseudorhodobacter*, *Moritella*, *Vibrio*,  
111 *Roseovarius*, *Aequorivita*, and *Flavobacterium* were higher in the early stage of  
112 fermentation than in the other stages. *Staphylococcus* content was highest in fermentation  
113 metaphase, followed by anaphase, and lowest in prophase.

114 Principal coordinate analysis clustered the communities according to different stages  
115 (Fig. 3). Regardless of the community stage, there were no definitive splits in the  
116 microbiota of the shrimp paste. However, the most extreme outliers tended to be in Stage  
117 11 in the fermentation anaphase. No statistical differences were found in operational  
118 taxonomic units at the genus level.

## 119 **Discussion**

120 In this study, high-throughput sequencing provided detailed insights into the  
121 complex microbiota of shrimp paste at different fermentation stages. We found that there  
122 were 30 phyla, 55 classes, 86 orders, 206 families, and 695 genera in the shrimp paste.

123 *Proteobacteria* was dominant, reaching 55.59%, and it was high at the  
124 pre-fermentation stage. *Proteobacteria* is a major group of gram-negative bacteria, which  
125 is widespread in humans (24), shrimp (25) and crabs (26-27). It is the dominant group in  
126 coastal areas and aquaculture ponds (28-32). The shrimp used in this study came from the  
127 Yellow Sea, where the major bacterial group is *Proteobacteria*, and therefore the  
128 dominance of *Proteobacteria* in the shrimp paste may be related to its source materials.

129 The *Proteobacteria* is the largest group of bacteria, and it includes many pathogenic  
130 bacteria, such as *E. coli*, *Salmonella*, and *Helicobacter pylori* (33). *Proteobacteria* levels  
131 in food are mainly related to its freshness, and transport and storage hygiene conditions.  
132 Therefore, *Proteobacteria* may greatly influence the quality of shrimp paste, and it is  
133 necessary to strictly control their growth during its fermentation, production, and storage  
134 to standardize production.

135 *Psychrobacter* was the most abundant genus in the shrimp paste. It was present at  
136 highest levels in the early stage of fermentation. *Psychrobacter* is facultatively anaerobic  
137 and is common in high-salt foods (34). Once it appears in high-salt foods, it multiplies  
138 and can easily cause food spoilage, so it is key to the control of fermented foods (35-36).  
139 The gram-negative bacteria *Halomonas*, which also grows in high concentrations of salt  
140 (37-38), occurred mainly in late fermentation. Its presence has been suggested to be an  
141 indicator of hygiene problems in shrimp paste (39). *Psychrobacter* and *Halomonas* can  
142 produce lipolytic enzymes that promote the degradation of flavoring substances and play  
143 an important role in the formation of flavor (40-41). Across the three fermentation stages,  
144 *Bacillus* and *Lactococcus* generally presented a decreasing trend. *Bacillus* can produce  
145 butyric acid, which can promote the growth of less acid-tolerant spoilage microorganisms  
146 and thus contaminate the shrimp paste (42). *Lactococcus* can react with the alcohols,  
147 aldehydes, and ketones produced during fermentation to form a variety of new taste  
148 substances. In addition, various antibacterial substances such as organic acids, diacetyl,  
149 hydrogen peroxide, and bacteriocins produced by *Lactococcus* may prevent the growth of

150 food spoilage bacteria and extend the shelf life of shrimp paste. *Lactococcus* may thus  
151 improve the functional attributes and shelf life of shrimp paste (43-45).

152 Several previous studies have focused on naturally fermented foods, including  
153 artisanal cheeses (46), Chinese liquor (47), and dairy products (48-49). In addition, there  
154 has been some research into the microbial diversity of shrimp culture environments, and  
155 the chemical composition and sensory attributes of shrimp paste [50]. However, there has  
156 not been a study of the microbial diversity of shrimp paste, which is a naturally fermented  
157 food. We addressed this research gap and found that the presence of bacteria  
158 corresponded mainly to four phyla (*Proteobacteria*, *Firmicutes*, *Actinobacteria*, and  
159 *Bacteroidetes*), and five major genera (*Psychrobacter*, *Halomonas*, *Bacillus*, *Alteribacillus*,  
160 and *Lactococcus*). These microbes all have a certain influence on the quality and flavor of  
161 shrimp paste.

162 We used high-throughput sequencing to investigate the microbiota of shrimp paste at  
163 different fermentation stages. Our analysis furthers understanding of the microbial  
164 community of shrimp paste and the relationship between microbial diversity and shrimp  
165 paste flavor. Our findings are of great significance to the technological control of shrimp  
166 paste. The standardization of production is important for ensuring the quality and safety  
167 of shrimp paste and improving its quality and nutritional value.

168

## 169 **Materials and Methods**

### 170 **Sample collection and nucleic acid extraction**



171 Shrimp paste samples were collected from Lianyungang, in Jiangsu Province. The  
172 shrimp paste was freshly produced in May 2017. During the production process, three  
173 stages of shrimp paste were analyzed. Samples were obtained during fermentation  
174 prophase, fermentation metaphase, and fermentation anaphase. The whole fermentation  
175 process lasted for 1 month and each stage took 10 days. The samples taken from  
176 fermentation prophase were labeled S1–S4, and the samples taken from fermentation  
177 metaphase and fermentation anaphase were defined as S5–S8 and S9–S11, respectively.  
178 DNA was extracted using an E.Z.N.A.<sup>TM</sup> Mag-Bind Soil DNA Kit (OMEGA, USA).

### 179 **PCR amplification of the microbial community 16S rRNA genes**

180 The DNA extracts were used as a template for PCR amplification according to the  
181 methods described for Qubit 2.0 (Life, USA). The V3-V4 region of bacterial 16S rRNA  
182 was amplified by PCR for high-throughput sequencing. The PCR reaction included two  
183 rounds of amplification, resulting in more specific and accurate results by sequencing at  
184 both ends. In the first round of amplification, the bacterial 16S rRNA gene V3-V4 region  
185 was amplified with the universal forward 341F (CCTACGGGNGGCWGCAG) and  
186 reverse 805R (GACTACHVGGGTATCTAATCC) primers. These primers contained a  
187 set of 6-nucleotide barcodes. The PCR mixture contained 15 µl 2× Taq master mix, 1 µl  
188 bar-PCR primer F (10 uM), 1 µl primer R (10 uM), 10–20 ng genomic DNA, and  
189 ultra-pure H<sub>2</sub>O to give a final reaction volume of 30 µl. PCR amplification of the 16S  
190 rRNA V3-V4 regions was performed using a T100<sup>TM</sup> Thermal Cycler (BIO-RAD, USA).  
191 The amplification program was as follows: 1 cycle of denaturing at 94 °C for 3 min, 5

192 cycles of denaturing at 94 °C for 30 s, annealing at 45 °C for 20 s, elongation at 65 °C for  
193 30 s, then 20 cycles of denaturing at 94 °C for 20 s, annealing at 55 °C for 20 s, elongation  
194 at 72 °C for 30 s and a final extension at 72 °C for 5 min. In the second round of  
195 amplification, the PCR mixture contained 15 µl 2× Taq master mix, 1 µl primer F (10  
196 uM), 1 µl primer R (10 uM), 20 ng genomic DNA, and ultra-pure H<sub>2</sub>O to give a final  
197 reaction volume of 30 µl. PCR amplification of the 16S rRNA V3-V4 regions was  
198 performed using a T100<sup>TM</sup> Thermal Cycler (BIO-RAD, USA). The amplification program  
199 was as follows: 1 cycle of denaturing at 95 °C for 3 min, then 5 cycles of denaturing at  
200 94 °C for 20 s, annealing at 55 °C for 20 s, elongation at 72 °C for 30 s and a final  
201 extension at 72 °C for 5 min. The PCR products were checked using electrophoresis in 1%  
202 (w/v) agarose gels in TBE buffer (Tris, boric acid, EDTA) stained with ethidium bromide  
203 and visualized under UV light. We used Agencourt AMPure XP beads (Beckman, USA)  
204 to purify the free primers and primer dimer species in the amplification product. Before  
205 sequencing, the DNA concentration of each PCR product was determined using a Qubit  
206 2.0 kit and it was quality controlled using a bioanalyzer (Agilent, USA). The  
207 amplifications from each reaction mixture were pooled in equimolar ratios based on their  
208 concentrations.

### 209 **High-throughput sequencing and bioinformatics analysis**

210 The V3-V4 region of bacterial 16S rRNA was sequenced on an Illumina MiSeq system  
211 (Illumina MiSeq, USA), according to the manufacturer's instructions. Raw sequences  
212 were selected based on sequence length, quality, primer, and tag, and data were collected

213 as follows. (i) The two short Illumina readings were assembled by PEAR (v.0.9.6)  
214 software according to the overlap and fastq files were processed to generate individual  
215 fasta and qual files, which could then be analyzed by standard methods. (ii) Sequences  
216 containing ambiguous bases and any longer than 480 bp were dislodged and those with a  
217 maximum homopolymer length of 6 bp were allowed. Sequences shorter than 200 bp  
218 were removed. (iii) All identical sequences were merged into one. (iv) Sequences were  
219 aligned according to a customized reference database. (v) The completeness of the index  
220 and the adaptor was checked and removed all of the index and the adaptor sequence. (vi)  
221 Noise was removed using the Pre.cluster tool. Chimeras were detected using Chimera  
222 UCHIME (v.4.2.40). We submitted the effective sequences of each sample to the RDP  
223 Classifier to identify bacterial and fungal sequences. Species richness and diversity  
224 statistics including coverage, chao1, ACE, Simpson and Shannon indexes were calculated  
225 using MOTHUR (v.1.30.1). A rarefaction curve was used to monitor results for  
226 sequencing abundance with the MOTHUR package. Principal coordinate analysis,  
227 measuring dissimilarities at phylogenetic distances based on weighted and unweighted  
228 Unifrac analysis, was performed using the QIIME suite of programs. According to the  
229 classification results, it was possible to determine the classification of the samples at the  
230 taxonomic level. The results indicated (i) which microorganisms were contained in the  
231 sample, and (ii) the relative abundance of each microorganism in the sample. The results  
232 at the species level can be analyzed by R(v3.2). We used MUSCLE (v.3.8.31) for  
233 multi-sequence alignment to obtain the alignment file, and FASTTREE (v.2.1.3)

234 approximately-maximum-likelihood to construct the phylogenetic tree, inferring the order  
235 of the biological evolution of the sample. After analyzing the composition of the gene  
236 functions of the sequenced microbial genome, PICRUST (v.1.0.0) was used to analyze  
237 the differences in function between different samples and groups obtained by sequencing  
238 according to their functional gene composition.

### 239 **Acknowledgments**

240 This work was supported by the Jiangsu Provincial Department of Science and  
241 Technology (BE2017316, BE2017326)

242 We thank Lianyungang Haiwa Food Co., Ltd. for the shrimp paste.

243 I wish to thank WANG Limei for guidance on the experimental and have made a great  
244 contribution to this article.

### 245 **References**

246 [1]Jung W Y, Lee H J, Jeon C O. Halomonas garicola sp. nov., isolated from saeu-jeot, a  
247 Korean salted and fermented shrimp paste[J]. International journal of systematic and  
248 evolutionary microbiology, 2016, 66(2): 731-737. DOI 10.1099/ijsem.0.000784

249 [2]Duan S, Hu X, Li M, et al. Composition and Metabolic Activities of the Bacterial  
250 Community in Shrimp Paste at the Flavor-Forming Stage of Fermentation As Revealed  
251 by Metatranscriptome and 16S rRNA Gene Sequencings[J].Journal of agricultural and  
252 food chemistry, 2016, 64(12):2591-2603. DOI: 10.1021/acs.jafc.5b05826

253 [3]Mao X, Zhang J, Kan F, et al. Antioxidant production and chitin recovery from shrimp  
254 head fermentation with Streptococcus thermophilus[J].Food Science and Biotechnology,

- 255 2013, 22(4):1023-1032. DOI:10.1007/s10068-013-0179-5
- 256 [4]Mao X, Liu P, He S, et al. Antioxidant properties of bio-active substances from shrimp  
257 head fermented by *Bacillus licheniformis* OPL-007[J].Applied biochemistry and  
258 biotechnology, 2013, 171(5):1240-1252. DOI :10.1007/s12010-013-0217-z
- 259 [5]Pongsetjul J, Benjakul S, Sampavapol P, et al.Chemical compositions, sensory and  
260 antioxidative properties of salted shrimp paste (Ka-pi) in Thailand[J]. International Food  
261 Research Journal, 2015, 22(4):1454-1465
- 262 [6]Halder S K, Adak A, Maity C, et al. Exploitation of fermented shrimp-shells  
263 hydrolysate as functional food: assessment of antioxidant, hypocholesterolemic and  
264 prebiotic activities[J].Indian Journal of Experimental Biology, 2013, 51(12):924-934
- 265 [7] Faithong N, Benjakul S. Changes in antioxidant activities and physicochemical  
266 properties of Kapi, a fermented shrimp paste, during fermentation[J]. Journal of Food  
267 Science & Technology, 2014, 51(10):2463-2471. DOI 10.1007/s13197-012-0762-4
- 268 [8] Pongsetkul J, Benjakul S, Sampavapol P, et al. Chemical compositions, sensory and  
269 antioxidative properties of salted shrimp paste (Ka-pi) in Thailand.[J]. International Food  
270 Research Journal, 2015.
- 271 [9] Sun G Y, Zuo Y P. Fermentation Technology and Research Progress of Shrimp  
272 Paste[J]. China Condiment, 2013.
- 273 [10]Soon W W, Hariharan M, Snyder M P. High-throughput sequencing for biology and  
274 medicine[J].Molecular systems biology, 2013, 9(1):640-648. DOI:10.1038/msb.2012.61
- 275 [11]Alessandria V, Ferrocino I, De Filippis F, et al. Microbiota of an Italian Grana-Like

- 276 cheese during manufacture and ripening, unraveled by 16S rRNA-Based approaches[J].  
277 Applied and environmental microbiology, 2016, 82(13): 3988-3995.  
278 DOI:10.1128/AEM.00999-16.
- 279 [12]Wey J K, Jürgens K, Weitere M. Seasonal and successional influences on bacterial  
280 community composition exceed that of protozoan grazing in river biofilms[J]. Applied  
281 and environmental microbiology, 2012, 78(6): 2013-2024. DOI:10.1128/AEM.06517-11
- 282 [13]Robertson C E, Baumgartner L K, Harris J K, et al. Culture-independent analysis of  
283 aerosol microbiology in a metropolitan subway system[J]. Applied and environmental  
284 microbiology, 2013, 79(11): 3485-3493. DOI:10.1128/AEM.00331-13
- 285 [14]Ercolini D. High-throughput sequencing and metagenomics: moving forward in the  
286 culture-independent analysis of food microbial ecology[J].Applied and environmental  
287 microbiology, 2013, 79(10):3148-3155. DOI:10.1128/AEM.00256-13
- 288 [15]Li X R, Ma E B, Yan L Z, et al. Bacterial and fungal diversity in the starter  
289 production process of Fen liquor, a traditional Chinese liquor[J].Journal of Microbiology,  
290 2013, 51(4):430-438. DOI 10.1007/s12275-013-2640-9
- 291 [16]Wolfe B E, Button J E, Santarelli M, et al. Cheese rind communities provide tractable  
292 systems for in situ and in vitro studies of microbial diversity[J].Cell, 2014,  
293 158(2):422-433. <http://dx.doi.o/10.1016/j.cell.2014.05.041>
- 294 [17]Gao J, GU F, HE J, et al. Metagenome analysis of bacterial diversity in Tibetan kefir  
295 grains[J].European Food Research and Technology, 2013, 236(3):549-556. DOI  
296 10.1007/s00217-013-1912-2

- 297 [18] Di Bella J M, Bao Y, Gloor G B, et al. High throughput sequencing methods and  
298 analysis for microbiome research[J].Journal of microbiological methods, 2013,  
299 95(3):401-414
- 300 [19]Jung J Y, Lee S H, Lee H J, et al. Microbial succession and metabolite changes  
301 during fermentation of saeu-jeot: traditional Korean salted seafood[J]. Food microbiology,  
302 2013, 34(2): 360-368.
- 303 [20] Rezaee S, Farahmand H, Nematollahi M A. Genetic diversity status of Pacific white  
304 shrimp (*Litopenaeus vannamei*) using SSR markers in Iran[J].Aquaculture International,  
305 2016, 24(2):479-489.DOI 10.1007/s10499-015-9939-y
- 306 [21]Vaseeharan B, Rajakamaran P, Jayaseelan D, et al. Molecular markers and their  
307 application in genetic diversity of penaeid shrimp[J].Aquaculture international, 2013,  
308 21(2):219-241. DOI 10.1007/s10499-012-9582-9
- 309 [22]Rajakumaran P, Vaseeharan B. Survey on Penaeidae shrimp diversity and  
310 exploitation in south east coast of India[J]. Fisheries and Aquaculture Journal, 2015.  
311 <http://dx.doi.org/10.4172/2150-3508.1000103>
- 312 [23] Jinap S, Ilyanur A R, Tang S C, et al. Sensory attributes of dishes containing shrimp  
313 paste with different concentrations of glutamate and 5'-nucleotides.[J]. Appetite, 2010,  
314 55(2):238-244.
- 315 [24]Qin N, Yang F, LI A, et al. Alterations of the human gut microbiome in liver  
316 cirrhosis[J].Nature, 2014, 513(7516):59-78. DOI:10.1038/nature13568
- 317 [25]Xiong J, Wang K, Wu J, et al. Changes in intestinal bacterial communities are closely

318 associated with shrimp disease severity[J].Applied microbiology and biotechnology, 2015,  
319 99(16):6911-6919.DOI 10.1007/s00253-015-6632-z

320 [26]Li S, Sun L, Wu H, et al. The intestinal microbial diversity in mud crab (*Scylla*  
321 *paramamosain*) as determined by PCR - DGGE and clone library analysis[J].Journal of  
322 applied microbiology, 2012, 113(6):1341-1351. DOI:10.1111/jam.12008

323 [27]Zhang M, Sun Y, Chen L, et al. Symbiotic bacteria in gills and guts of Chinese mitten  
324 crab (*Eriocheir sinensis*) differ from the free-living bacteria in water[J].PloS one, 2016,  
325 11(1):e0148135-e0148147. DOI:10.1371/journal.pone.0148135

326 [28]Gilbert J A, Steele J A, Caporaso J G, et al. Defining seasonal marine microbial  
327 community dynamics[J].The ISME journal, 2012,  
328 6(2):298-308.DOI:10.1038/ismej.2011.107

329 [29] Zhao, Yanting, et al. "Metagenomic analysis revealed the prevalence of antibiotic  
330 resistance genes in the gut and living environment of freshwater shrimp." Journal of  
331 hazardous materials 350 (2018): 10-18.

332 [30]Fan, Limin, et al. "Methanogenic community compositions in surface sediment of  
333 freshwater aquaculture ponds and the influencing factors." Antonie van  
334 Leeuwenhoek 111.1 (2018): 115-124. <https://doi.org/10.1007/s10482-017-0932-5>

335 [31]Cornejo-Granados, Fernanda, et al. "Microbiome of Pacific Whiteleg shrimp reveals  
336 differential bacterial community composition between Wild, Aquacultured and  
337 AHPND/EMS outbreak conditions." Scientific reports 7.1 (2017): 11783.  
338 DOI:10.1038/s41598-017-11805-w



- 339 [32]Zhang, Qing, et al. "Temporal heterogeneity of prokaryotic micro-organism  
340 communities in sediment of traditional freshwater cultured fish ponds in Southwest  
341 China." *Biotechnology & Biotechnological Equipment* 32.1 (2018): 102-108.  
342 <https://doi.org/10.1080/13102818.2017.1400403>
- 343 [33]Kilinc B, Besler A. Seafood toxins and poisonings[J]. *Turkish Journal of Aquatic  
344 Sciences*, 2015, 30(1): 35-52. DOI: 10.18864/iujfas.60084
- 345 [34]Wu G, Zhang X, Wei L, et al. A cold-adapted, solvent and salt tolerant esterase from  
346 marine bacterium *Psychrobacter pacificensis*[J]. *International journal of biological  
347 macromolecules*, 2015, 81: 180-187.
- 348 [35]Stellato G, De Filippis F, La Stora A, et al. Coexistence of lactic acid bacteria and  
349 potential spoilage microbiota in a dairy processing environment[J]. *Applied and  
350 environmental microbiology*, 2015, 81(22): 7893-7904.DOI:10.1128/AEM.02294-15.
- 351 [36]Ferrocino I, Bellio A, Romano A, et al. RNA-based amplicon sequencing reveals  
352 microbiota development during ripening of artisanal versus industrial Lard d'Arnad[J].  
353 *Applied and environmental microbiology*, 2017, 83(16): e00983-17.  
354 <https://doi.org/10.1128/AEM.00983-17>.
- 355 [37]Burch A Y, Finkel O M, Cho J K, et al. Diverse microhabitats experienced by  
356 *Halomonas variabilis* on salt-secreting leaves[J]. *Applied and environmental  
357 microbiology*, 2013, 79(3): 845-852. DOI:10.1128/AEM.02791-12
- 358 [38]Kaye J Z, Baross J A. Synchronous effects of temperature, hydrostatic pressure, and  
359 salinity on growth, phospholipid profiles, and protein patterns of four *Halomonas* species

360 isolated from deep-sea hydrothermal-vent and sea surface environments[J]. Applied and  
361 environmental microbiology, 2004, 70(10): 6220-6229. DOI:  
362 10.1128/AEM.70.10.6220-6229.2004

363 [39]Maoz A, Mayr R, Scherer S. Temporal stability and biodiversity of two complex  
364 antilisterial cheese-ripening microbial consortia[J]. Applied and Environmental  
365 Microbiology, 2003, 69(7): 4012-4018. DOI: 10.1128/AEM.69.7.4012-4018.2003

366 [40]Kim S, Wi A R, Park H J, et al. Enhancing extracellular lipolytic enzyme production  
367 in an arctic bacterium, *Psychrobacter* sp. ArcL13, by using statistical optimization and  
368 fed-batch fermentation[J]. Preparative Biochemistry and Biotechnology, 2015, 45(4):  
369 348-364. DOI: 10.1080/10826068.2014.940964

370 [41]Hinrichsen L L, Montel M C, Talon R. Proteolytic and lipolytic activities of  
371 *Micrococcus roseus* (65), *Halomonas elongata* (16) and *Vibrio* sp.(168) isolated from  
372 Danish bacon curing brines[J]. International journal of food microbiology, 1994, 22(2-3):  
373 115-126.

374 [42]Duniere L, Xu S, Long J, et al. Bacterial and fungal core microbiomes associated  
375 with small grain silages during ensiling and aerobic spoilage[J]. BMC microbiology,  
376 2017, 17(1): 50. DOI 10.1186/s12866-017-0947-0

377 [43]Peng K, Jin L, Niu Y D, et al. Condensed tannins affect bacterial and fungal  
378 microbiomes and mycotoxin production during ensiling and upon aerobic exposure[J].  
379 Applied and environmental microbiology, 2018, 84(5): e02274-17.  
380 <https://doi.org/10.1128/AEM.02274-17>.

- 381 [44]Minervini F, Conte A, Del Nobile M A, et al. Dietary fibers and protective  
382 lactobacilli drive burrata cheese microbiome[J]. Applied and environmental microbiology,  
383 2017, 83(21): e01494-17.  
384 <https://doi.org/10.1128/AEM.01494-17>.
- 385 [45]Frantzen C A, Kleppen H P, Holo H. Lactococcus lactis Diversity in Undefined  
386 Mixed Dairy Starter Cultures as Revealed by Comparative Genome Analyses and  
387 Targeted Amplicon Sequencing of epsD[J]. Applied and environmental microbiology,  
388 2018, 84(3): e02199-17. <https://doi.org/10.1128/AEM.02199-17>.
- 389 [46]Quigley L, O'Sullivan O, Beresford T P, et al. High-throughput sequencing for  
390 detection of subpopulations of bacteria not previously associated with artisanal cheeses[J].  
391 Applied and environmental microbiology, 2012, 78(16): 5717-5723.  
392 DOI:10.1128/AEM.00918-12
- 393 [47]Wang X, Du H, Zhang Y, et al. Environmental Microbiota Drives Microbial  
394 Succession and Metabolic Profiles during Chinese Liquor Fermentation[J]. Applied and  
395 environmental microbiology, 2018, 84(4): e02369-17.  
396 <https://doi.org/10.1128/AEM.02369-17>.
- 397 [48]Cruciata M, Gaglio R, Scatassa M L, et al. Formation and characterization of early  
398 bacterial biofilms on different wood typologies applied in dairy production[J]. Applied  
399 and environmental microbiology, 2018, 84(4): e02107-17.  
400 <https://doi.org/10.1128/AEM.02107-17>.
- 401 [49]Muhammed M K, Kot W, Neve H, et al. Metagenomic analysis of dairy

402 bacteriophages: Extraction method and pilot study on whey samples derived from using  
403 undefined and defined mesophilic starter cultures[J]. Applied and environmental  
404 microbiology, 2017, 83(19): e00888-17. . <https://doi.org/10.1128/AEM00888-17>.  
405 [50] Pilapil A R, Neyrinck E, Deloof D, et al. Chemical quality assessment of traditional  
406 salt-fermented shrimp paste from Northern Mindanao, Philippines[J]. Journal of the  
407 Science of Food & Agriculture, 2015, 96(3):933-938. DOI 10.1002/jsfa.7167

408 TABLE 1 Sequencing richness, diversity and coverage of shrimp paste

|                   | Sample | Sequence<br>Number | OTUs | ACE<br>value | Chao1<br>value | Shannon<br>value | Simpson<br>value | Coverage<br>value |
|-------------------|--------|--------------------|------|--------------|----------------|------------------|------------------|-------------------|
| Pre-fermentation  | S1     | 38839              | 1126 | 2271.33      | 1733.72        | 3.65             | 0.11             | 0.99              |
|                   | S2     | 38189              | 1267 | 2711.08      | 2033.24        | 4.05             | 0.08             | 0.99              |
|                   | S3     | 38118              | 1175 | 2737.034     | 1928.85        | 4.11             | 0.04             | 0.99              |
|                   | S4     | 38620              | 1183 | 2523.93      | 1881.28        | 4.01             | 0.08             | 0.99              |
|                   | S5     | 43141              | 1360 | 3043.06      | 2375.37        | 4.22             | 0.06             | 0.99              |
| Mid-fermentation  | S6     | 42339              | 1354 | 2984.96      | 2036.04        | 4.18             | 0.04             | 0.99              |
|                   | S7     | 42317              | 1247 | 2841.50      | 2029.11        | 4.27             | 0.04             | 0.99              |
|                   | S8     | 42118              | 1358 | 2710.46      | 2032.13        | 4.07             | 0.07             | 0.99              |
| Late-fermentation | S9     | 50558              | 1499 | 3274.64      | 2373.14        | 4.16             | 0.05             | 0.99              |
|                   | S10    | 37849              | 1082 | 2209.89      | 1657.94        | 3.99             | 0.05             | 0.99              |
|                   | S11    | 36828              | 1217 | 2707.96      | 2056.04        | 3.92             | 0.06             | 0.98              |

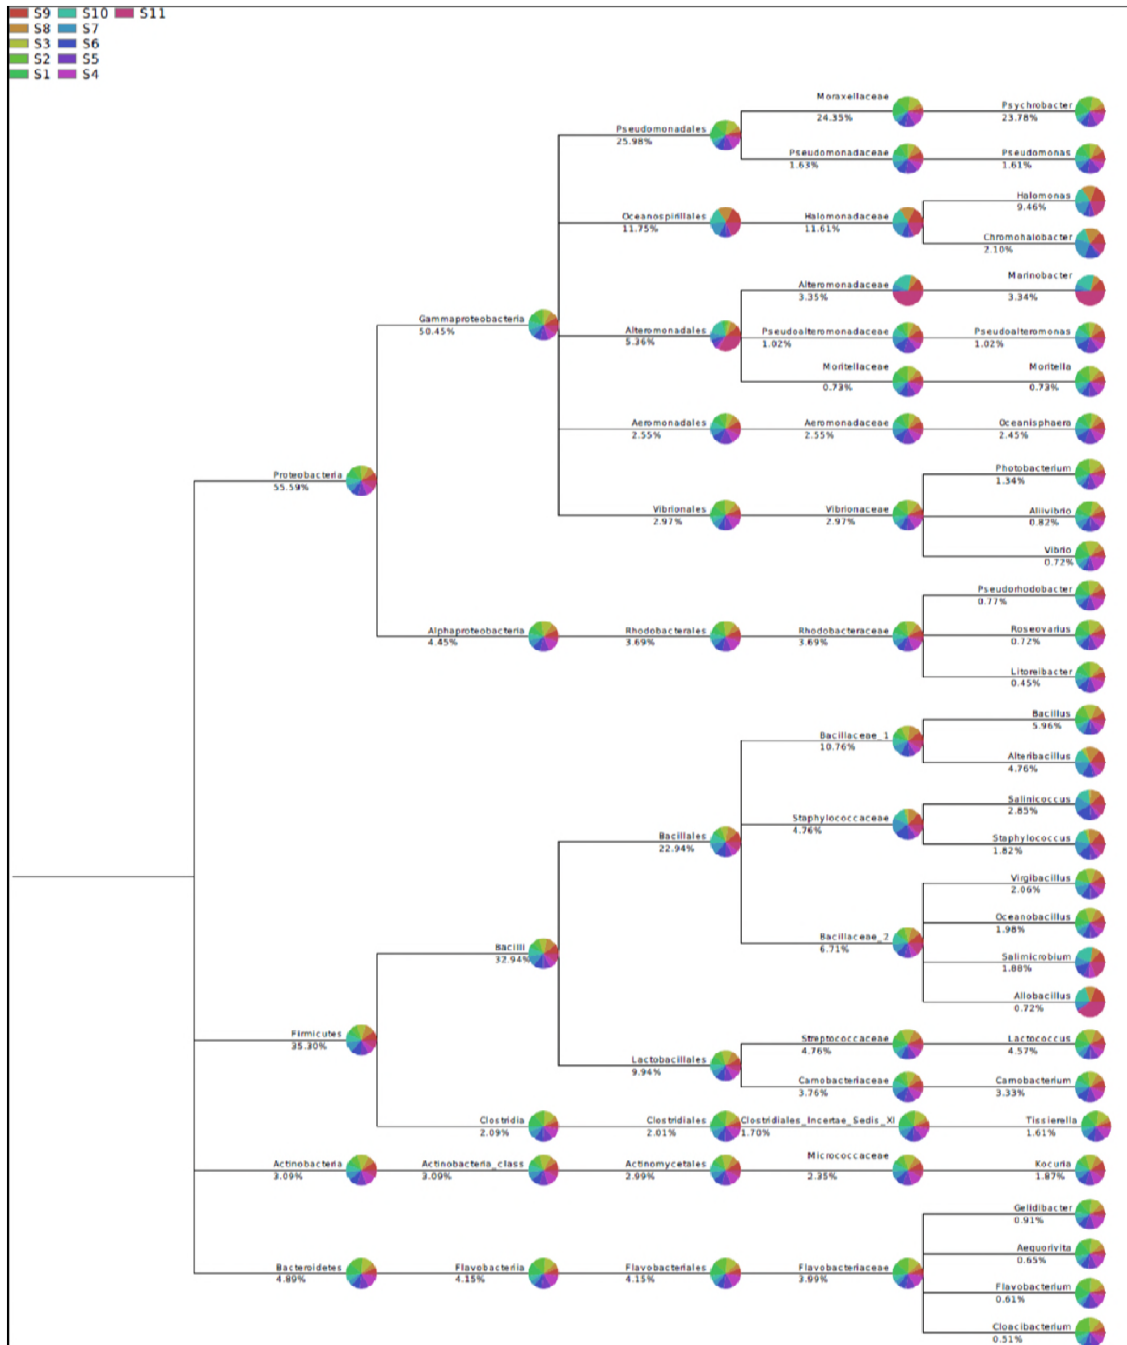

409

410

FIG 1 Phylogenetic tree of shrimp paste

411

TABLE 2 Summary of reads calculated from total phylum reads for variable assessed

|  | % of reads In the phylum or genus per: |    |    |    |                  |    |    |    |                   |     |     |
|--|----------------------------------------|----|----|----|------------------|----|----|----|-------------------|-----|-----|
|  | Pre-fermentation                       |    |    |    | Mid-fermentation |    |    |    | Late-fermentation |     |     |
|  | S1                                     | S2 | S3 | S4 | S5               | S6 | S7 | S8 | S9                | S10 | S11 |

Phyla

|                          |       |       |       |       |       |       |       |       |       |       |       |
|--------------------------|-------|-------|-------|-------|-------|-------|-------|-------|-------|-------|-------|
| <i>Proteobacteria</i>    | 60.02 | 59.61 | 53.43 | 53.27 | 55.24 | 50.64 | 52.51 | 52.1  | 53.18 | 54.65 | 58.15 |
| <i>Firmicutes</i>        | 28.52 | 28.51 | 34.64 | 35.39 | 33.41 | 39.97 | 39.98 | 41.14 | 39.54 | 38.69 | 36.55 |
| <i>Bacteroidetes</i>     | 7.7   | 7.71  | 6.89  | 5.76  | 6.19  | 4.67  | 3.51  | 3.17  | 3.29  | 2.98  | 2.16  |
| <i>Actinobacteria</i>    | 2.16  | 2.85  | 3.83  | 4.32  | 3.43  | 3.48  | 3.02  | 2.52  | 3.02  | 2.34  | 2.53  |
| <i>Verrucomicrobia</i>   | 0.48  | 0.46  | 0.49  | 0.52  | 0.77  | 0.61  | 0.43  | 0.43  | 0.44  | 0.64  | 0.26  |
| <i>Planctomycetes</i>    | 0.27  | 0.13  | 0.23  | 0.19  | 0.2   | 0.18  | 0.11  | 0.15  | 0.18  | 0.25  | 0.1   |
| <i>Fusobacteria</i>      | 0.31  | 0.16  | 0.19  | 0.13  | 0.15  | 0.12  | 0.16  | 0.1   | 0.1   | 0.13  | 0.05  |
| Genera                   |       |       |       |       |       |       |       |       |       |       |       |
| <i>Psychrobacter</i>     | 40.04 | 38.67 | 34.67 | 34.32 | 29.43 | 22.02 | 12.98 | 13    | 11.47 | 10.61 | 7.95  |
| <i>Halomonas</i>         | 0     | 0.02  | 0.14  | 0.24  | 5.94  | 6.7   | 16.03 | 15.91 | 18.79 | 18.85 | 21.89 |
| <i>Bacillus</i>          | 8.98  | 7.38  | 8.88  | 6.24  | 5.76  | 7.27  | 3.86  | 6.1   | 5.29  | 4.11  | 4.23  |
| <i>Alteribacillus</i>    | 0.04  | 0.65  | 2.11  | 5.12  | 2.04  | 5.54  | 9.16  | 8.16  | 7.63  | 7.15  | 4.67  |
| <i>Lactococcus</i>       | 6.97  | 5.54  | 6.87  | 4.71  | 4.86  | 5.56  | 2.92  | 5.26  | 3.93  | 3.25  | 3.35  |
| <i>Carnobacterium</i>    | 2.93  | 3.12  | 3.85  | 4.33  | 3.99  | 4.25  | 3.13  | 3.29  | 2.82  | 2.72  | 2.13  |
| <i>Marinobacter</i>      | 0.06  | 0.09  | 0.04  | 0.04  | 0.1   | 0.6   | 2.48  | 2.85  | 4.8   | 7.77  | 19.04 |
| <i>Salinicoccus</i>      | 0.01  | 0.09  | 0.67  | 1.78  | 2.58  | 4     | 5.46  | 4.28  | 4.03  | 4.29  | 3.22  |
| <i>Oceanisphaera</i>     | 2.75  | 1.93  | 1.82  | 2.27  | 3.89  | 2.77  | 2.24  | 2.41  | 2.24  | 2.18  | 1.59  |
| <i>Chromohalobacter</i>  | 0     | 0.02  | 0.15  | 0.22  | 0.78  | 3.63  | 5.82  | 3.37  | 3.12  | 3.04  | 2.88  |
| <i>Virgibacillus</i>     | 0.1   | 3.53  | 2.36  | 1.75  | 1.77  | 2.13  | 2.78  | 2.3   | 2.03  | 1.71  | 1.41  |
| <i>Oceanobacillus</i>    | 3.01  | 2.38  | 2.99  | 1.94  | 2     | 2.48  | 1.3   | 1.93  | 1.8   | 1.27  | 1.52  |
| <i>Kocuria</i>           | 0.98  | 1.7   | 2.28  | 2.47  | 1.85  | 1.81  | 1.89  | 1.9   | 1.9   | 1.53  | 1.62  |
| <i>Salimicrobium</i>     | 0     | 0.01  | 0.03  | 2.6   | 1.07  | 2.43  | 2.26  | 2.17  | 2.58  | 4.98  | 3.81  |
| <i>Staphylococcus</i>    | 0.01  | 0.78  | 0.69  | 1.35  | 1.48  | 2.51  | 3.26  | 2.76  | 3.05  | 2.8   | 1.95  |
| <i>Tissierella</i>       | 2.7   | 2.12  | 2.31  | 2.04  | 2.05  | 1.65  | 1.66  | 1.11  | 0.95  | 0.77  | 0.47  |
| <i>Pseudomonas</i>       | 2.09  | 1.48  | 1.45  | 1.34  | 2.64  | 1.78  | 1.55  | 1.61  | 1.52  | 1.49  | 0.81  |
| <i>Photobacterium</i>    | 2.07  | 2.56  | 2.21  | 1.89  | 1.06  | 0.89  | 0.87  | 1     | 0.77  | 0.81  | 0.48  |
| <i>Pseudoalteromonas</i> | 0.82  | 0.68  | 0.84  | 0.84  | 1.42  | 1.43  | 1.18  | 1.21  | 1.11  | 1.01  | 0.72  |
| <i>Gelidibacter</i>      | 1.21  | 1.25  | 1.23  | 1.1   | 0.91  | 0.8   | 0.69  | 0.78  | 0.56  | 0.57  | 0.31  |
| <i>Aliivibrio</i>        | 0.79  | 1.52  | 0.64  | 0.75  | 0.95  | 0.93  | 0.88  | 0.48  | 0.8   | 0.76  | 0.47  |
| <i>Pseudorhodobacter</i> | 1     | 0.92  | 0.92  | 0.84  | 0.83  | 0.68  | 0.59  | 0.62  | 0.67  | 0.49  | 0.37  |
| <i>Moritella</i>         | 0.98  | 1.14  | 0.99  | 0.86  | 0.81  | 0.64  | 0.54  | 0.63  | 0.54  | 0.64  | 0.31  |
| <i>Vibrio</i>            | 1.41  | 0.65  | 1.2   | 1.49  | 0.53  | 0.39  | 0.73  | 0.74  | 0.37  | 0.37  | 0.19  |
| <i>Roseovarius</i>       | 0.94  | 1.01  | 1.05  | 0.75  | 0.96  | 0.85  | 0.57  | 0.3   | 0.48  | 0.54  | 0.44  |
| <i>Allobacillus</i>      | 0     | 0     | 0.05  | 0.06  | 0.06  | 0.09  | 0.59  | 0.83  | 1.52  | 1.38  | 3.33  |
| <i>Aequorivita</i>       | 1.2   | 0.76  | 1.01  | 0.9   | 0.63  | 0.6   | 0.47  | 0.49  | 0.42  | 0.42  | 0.2   |
| <i>Flavobacterium</i>    | 1.21  | 1.12  | 1.08  | 0.68  | 0.57  | 0.69  | 0.32  | 0.34  | 0.31  | 0.3   | 0.17  |
| <i>Tetragenococcus</i>   | 0     | 0.01  | 0     | 0.01  | 0.01  | 0.31  | 0.46  | 0.39  | 0.68  | 1.36  | 1.44  |

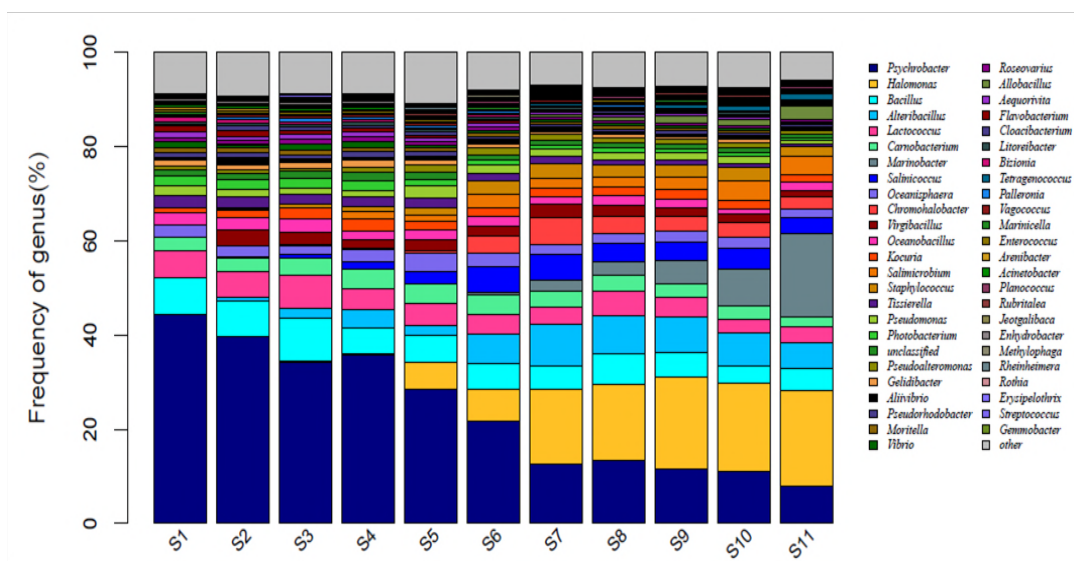

FIG 2 Assignment of shrimp paste at the genus level

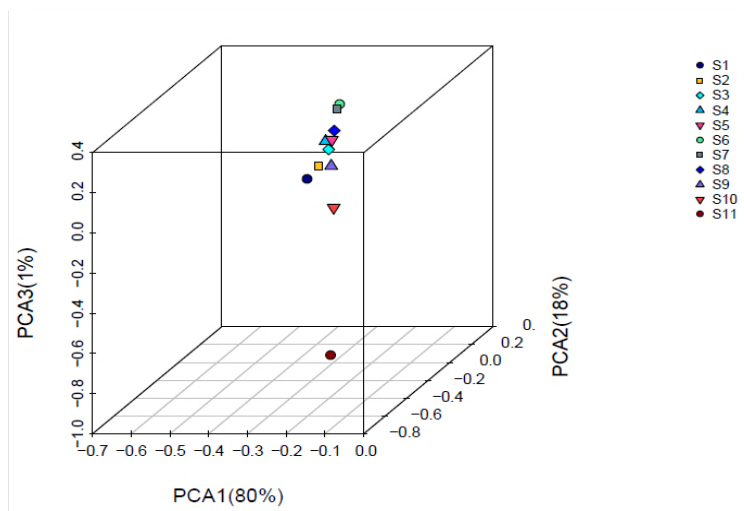

FIG 3 Principal coordinate analysis graphs of shrimp paste

TABLE 1 Sequencing richness, diversity and coverage of shrimp paste

|                   | Sample | Sequence Number | OTUs | ACE value | Chao1 value | Shannon value | Simpson value | Coverage value |
|-------------------|--------|-----------------|------|-----------|-------------|---------------|---------------|----------------|
| Pre-fermentation  | S1     | 38839           | 1126 | 2271.33   | 1733.72     | 3.65          | 0.11          | 0.99           |
|                   | S2     | 38189           | 1267 | 2711.08   | 2033.24     | 4.05          | 0.08          | 0.99           |
|                   | S3     | 38118           | 1175 | 2737.034  | 1928.85     | 4.11          | 0.04          | 0.99           |
|                   | S4     | 38620           | 1183 | 2523.93   | 1881.28     | 4.01          | 0.08          | 0.99           |
| Mid-fermentation  | S5     | 43141           | 1360 | 3043.06   | 2375.37     | 4.22          | 0.06          | 0.99           |
|                   | S6     | 42339           | 1354 | 2984.96   | 2036.04     | 4.18          | 0.04          | 0.99           |
|                   | S7     | 42317           | 1247 | 2841.50   | 2029.11     | 4.27          | 0.04          | 0.99           |
|                   | S8     | 42118           | 1358 | 2710.46   | 2032.13     | 4.07          | 0.07          | 0.99           |
| Late-fermentation | S9     | 50558           | 1499 | 3274.64   | 2373.14     | 4.16          | 0.05          | 0.99           |
|                   | S10    | 37849           | 1082 | 2209.89   | 1657.94     | 3.99          | 0.05          | 0.99           |
|                   | S11    | 36828           | 1217 | 2707.96   | 2056.04     | 3.92          | 0.06          | 0.98           |

**OTU:** operational taxonomic unit. In order to understand the community distribution information in sample sequencing, it is necessary to cluster the sequence (cluster). By clustering, it can be divided into many sequences according to the similarity of sequences, and the set of each sequence is an OTU. **Chao1:** Using Chao1 algorithm to estimate the index of OTU number in community, Chao1 is often used to estimate the total number of species in ecology. **Ace:** An index used to estimate the number of OTU in community, Proposed by Chao1, it is one of the common indices for estimating the total number of species in ecology, and the algorithm is different from Chao1. **Shannon:** It is used to estimate one of the microbial diversity indices in samples. Shannon and Simpson diversity index are often used to reflect alpha diversity index. The greater the Shannon value is, the higher the community diversity is. **Simpson:** Used to estimate one of the microbial diversity indices in samples. In ecology, it is often used to quantitatively describe the biodiversity of a region. The greater the Simpson index is, the lower the community diversity is. **Coverage:** Coverage rate of each sample library, the higher the values, the lower the probability



that the sequence is not detected in the sample. The index actually reflects whether the results of the sequencing represent the real situation of the sample.

TABLE 2 Summary of reads calculated from total phylum reads for variable assessed

|                          | % of reads In the phylum or genus per: |       |       |       |                  |       |       |       |                   |       |       |
|--------------------------|----------------------------------------|-------|-------|-------|------------------|-------|-------|-------|-------------------|-------|-------|
|                          | Pre-fermentation                       |       |       |       | Mid-fermentation |       |       |       | Late-fermentation |       |       |
|                          | S1                                     | S2    | S3    | S4    | S5               | S6    | S7    | S8    | S9                | S10   | S11   |
| <b>Phyla</b>             |                                        |       |       |       |                  |       |       |       |                   |       |       |
| <i>Proteobacteria</i>    | 60.02                                  | 59.61 | 53.43 | 53.27 | 55.24            | 50.64 | 52.51 | 52.1  | 53.18             | 54.65 | 58.15 |
| <i>Firmicutes</i>        | 28.52                                  | 28.51 | 34.64 | 35.39 | 33.41            | 39.97 | 39.98 | 41.14 | 39.54             | 38.69 | 36.55 |
| <i>Bacteroidetes</i>     | 7.7                                    | 7.71  | 6.89  | 5.76  | 6.19             | 4.67  | 3.51  | 3.17  | 3.29              | 2.98  | 2.16  |
| <i>Actinobacteria</i>    | 2.16                                   | 2.85  | 3.83  | 4.32  | 3.43             | 3.48  | 3.02  | 2.52  | 3.02              | 2.34  | 2.53  |
| <i>Verrucomicrobia</i>   | 0.48                                   | 0.46  | 0.49  | 0.52  | 0.77             | 0.61  | 0.43  | 0.43  | 0.44              | 0.64  | 0.26  |
| <i>Planctomycetes</i>    | 0.27                                   | 0.13  | 0.23  | 0.19  | 0.2              | 0.18  | 0.11  | 0.15  | 0.18              | 0.25  | 0.1   |
| <i>Fusobacteria</i>      | 0.31                                   | 0.16  | 0.19  | 0.13  | 0.15             | 0.12  | 0.16  | 0.1   | 0.1               | 0.13  | 0.05  |
| <b>Genera</b>            |                                        |       |       |       |                  |       |       |       |                   |       |       |
| <i>Psychrobacter</i>     | 40.04                                  | 38.67 | 34.67 | 34.32 | 29.43            | 22.02 | 12.98 | 13    | 11.47             | 10.61 | 7.95  |
| <i>Halomonas</i>         | 0                                      | 0.02  | 0.14  | 0.24  | 5.94             | 6.7   | 16.03 | 15.91 | 18.79             | 18.85 | 21.89 |
| <i>Bacillus</i>          | 8.98                                   | 7.38  | 8.88  | 6.24  | 5.76             | 7.27  | 3.86  | 6.1   | 5.29              | 4.11  | 4.23  |
| <i>Alteribacillus</i>    | 0.04                                   | 0.65  | 2.11  | 5.12  | 2.04             | 5.54  | 9.16  | 8.16  | 7.63              | 7.15  | 4.67  |
| <i>Lactococcus</i>       | 6.97                                   | 5.54  | 6.87  | 4.71  | 4.86             | 5.56  | 2.92  | 5.26  | 3.93              | 3.25  | 3.35  |
| <i>Carnobacterium</i>    | 2.93                                   | 3.12  | 3.85  | 4.33  | 3.99             | 4.25  | 3.13  | 3.29  | 2.82              | 2.72  | 2.13  |
| <i>Marinobacter</i>      | 0.06                                   | 0.09  | 0.04  | 0.04  | 0.1              | 0.6   | 2.48  | 2.85  | 4.8               | 7.77  | 19.04 |
| <i>Salinicoccus</i>      | 0.01                                   | 0.09  | 0.67  | 1.78  | 2.58             | 4     | 5.46  | 4.28  | 4.03              | 4.29  | 3.22  |
| <i>Oceanisphaera</i>     | 2.75                                   | 1.93  | 1.82  | 2.27  | 3.89             | 2.77  | 2.24  | 2.41  | 2.24              | 2.18  | 1.59  |
| <i>Chromohalobacter</i>  | 0                                      | 0.02  | 0.15  | 0.22  | 0.78             | 3.63  | 5.82  | 3.37  | 3.12              | 3.04  | 2.88  |
| <i>Virgibacillus</i>     | 0.1                                    | 3.53  | 2.36  | 1.75  | 1.77             | 2.13  | 2.78  | 2.3   | 2.03              | 1.71  | 1.41  |
| <i>Oceanobacillus</i>    | 3.01                                   | 2.38  | 2.99  | 1.94  | 2                | 2.48  | 1.3   | 1.93  | 1.8               | 1.27  | 1.52  |
| <i>Kocuria</i>           | 0.98                                   | 1.7   | 2.28  | 2.47  | 1.85             | 1.81  | 1.89  | 1.9   | 1.9               | 1.53  | 1.62  |
| <i>Salimicrobium</i>     | 0                                      | 0.01  | 0.03  | 2.6   | 1.07             | 2.43  | 2.26  | 2.17  | 2.58              | 4.98  | 3.81  |
| <i>Staphylococcus</i>    | 0.01                                   | 0.78  | 0.69  | 1.35  | 1.48             | 2.51  | 3.26  | 2.76  | 3.05              | 2.8   | 1.95  |
| <i>Tissierella</i>       | 2.7                                    | 2.12  | 2.31  | 2.04  | 2.05             | 1.65  | 1.66  | 1.11  | 0.95              | 0.77  | 0.47  |
| <i>Pseudomonas</i>       | 2.09                                   | 1.48  | 1.45  | 1.34  | 2.64             | 1.78  | 1.55  | 1.61  | 1.52              | 1.49  | 0.81  |
| <i>Photobacterium</i>    | 2.07                                   | 2.56  | 2.21  | 1.89  | 1.06             | 0.89  | 0.87  | 1     | 0.77              | 0.81  | 0.48  |
| <i>Pseudoalteromonas</i> | 0.82                                   | 0.68  | 0.84  | 0.84  | 1.42             | 1.43  | 1.18  | 1.21  | 1.11              | 1.01  | 0.72  |
| <i>Gelidibacter</i>      | 1.21                                   | 1.25  | 1.23  | 1.1   | 0.91             | 0.8   | 0.69  | 0.78  | 0.56              | 0.57  | 0.31  |
| <i>Aliivibrio</i>        | 0.79                                   | 1.52  | 0.64  | 0.75  | 0.95             | 0.93  | 0.88  | 0.48  | 0.8               | 0.76  | 0.47  |
| <i>Pseudorhodobacter</i> | 1                                      | 0.92  | 0.92  | 0.84  | 0.83             | 0.68  | 0.59  | 0.62  | 0.67              | 0.49  | 0.37  |
| <i>Moritella</i>         | 0.98                                   | 1.14  | 0.99  | 0.86  | 0.81             | 0.64  | 0.54  | 0.63  | 0.54              | 0.64  | 0.31  |
| <i>Vibrio</i>            | 1.41                                   | 0.65  | 1.2   | 1.49  | 0.53             | 0.39  | 0.73  | 0.74  | 0.37              | 0.37  | 0.19  |
| <i>Roseovarius</i>       | 0.94                                   | 1.01  | 1.05  | 0.75  | 0.96             | 0.85  | 0.57  | 0.3   | 0.48              | 0.54  | 0.44  |
| <i>Allobacillus</i>      | 0                                      | 0     | 0.05  | 0.06  | 0.06             | 0.09  | 0.59  | 0.83  | 1.52              | 1.38  | 3.33  |

|                        |      |      |      |      |      |      |      |      |      |      |      |
|------------------------|------|------|------|------|------|------|------|------|------|------|------|
| <i>Aequorivita</i>     | 1.2  | 0.76 | 1.01 | 0.9  | 0.63 | 0.6  | 0.47 | 0.49 | 0.42 | 0.42 | 0.2  |
| <i>Flavobacterium</i>  | 1.21 | 1.12 | 1.08 | 0.68 | 0.57 | 0.69 | 0.32 | 0.34 | 0.31 | 0.3  | 0.17 |
| <i>Tetragenococcus</i> | 0    | 0.01 | 0    | 0.01 | 0.01 | 0.31 | 0.46 | 0.39 | 0.68 | 1.36 | 1.44 |

---

The main phyla and genera in three fermentation stages of shrimp paste

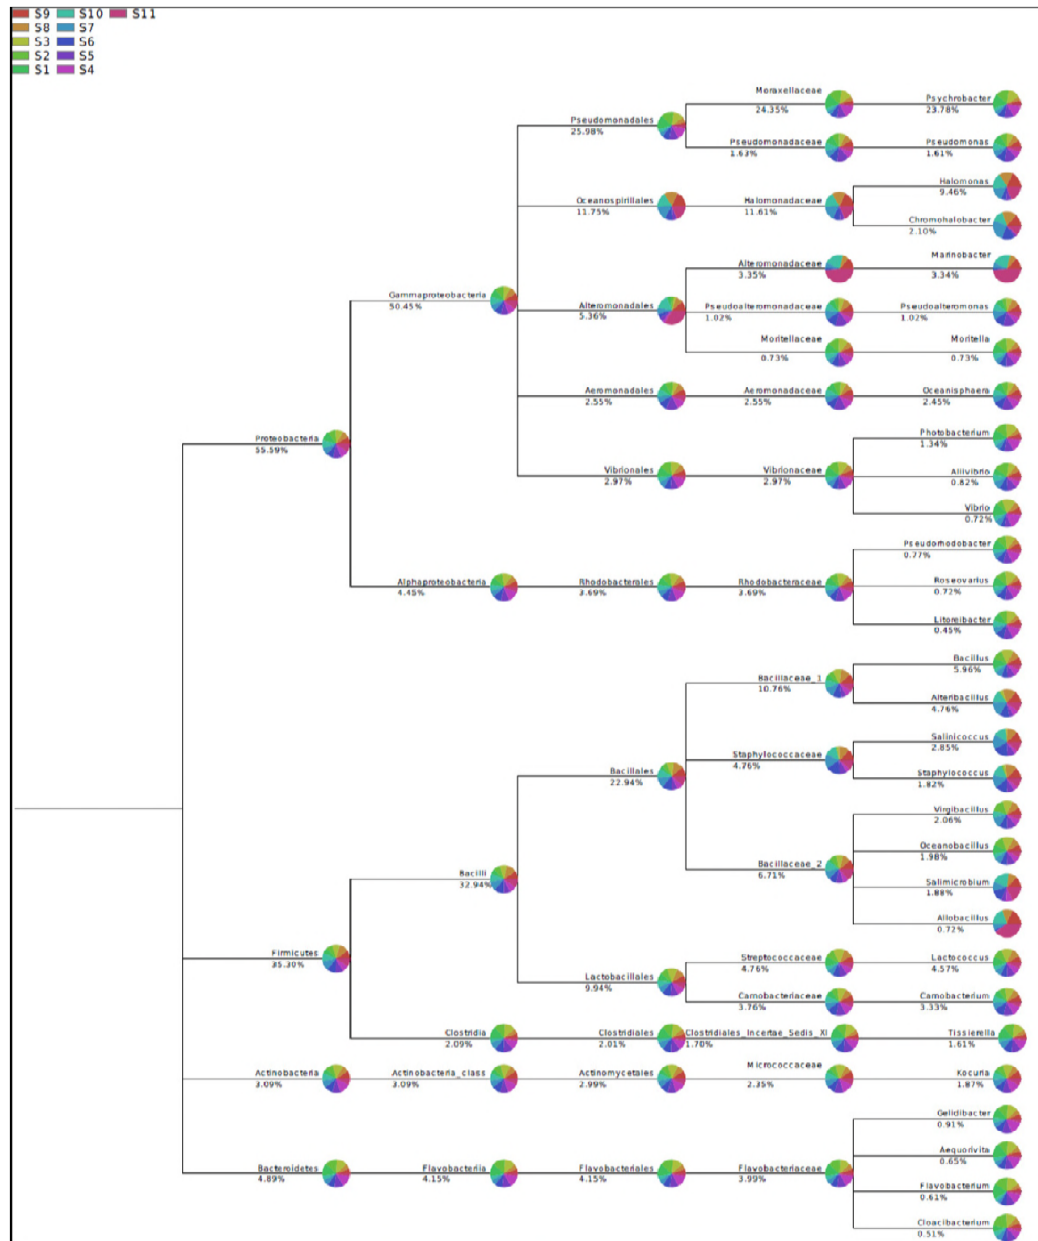

Figure 1 Phylogenetic tree of shrimp paste

The pivot points in the graph represent the corresponding Taxonomy records in the NCBI database, the English name is spelled near the pivot point. The larger the abundance of a species is, the larger the circle of the fulcrum is. When a number of samples are plotted simultaneously, the relative abundance of different samples can be expressed in different colors by means of a small pie chart at the branches or nodes.

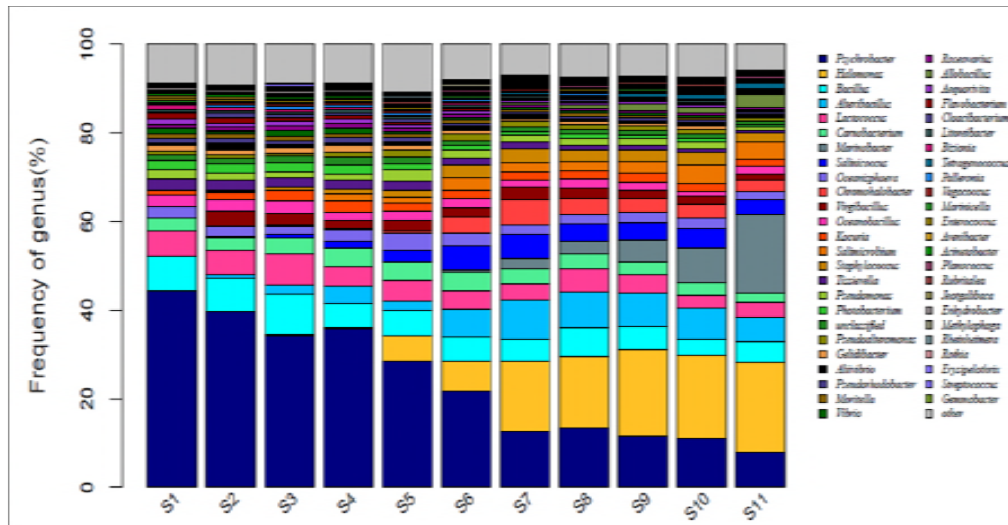

Figure 2 Assignment of shrimp paste at the genus level

The horizontal axis is the number of each sample, and the longitudinal axis is the relative abundance ratio. The color corresponds to the species name under the taxonomic level, and the width of different color blocks indicates the relative abundance ratio of differential species.

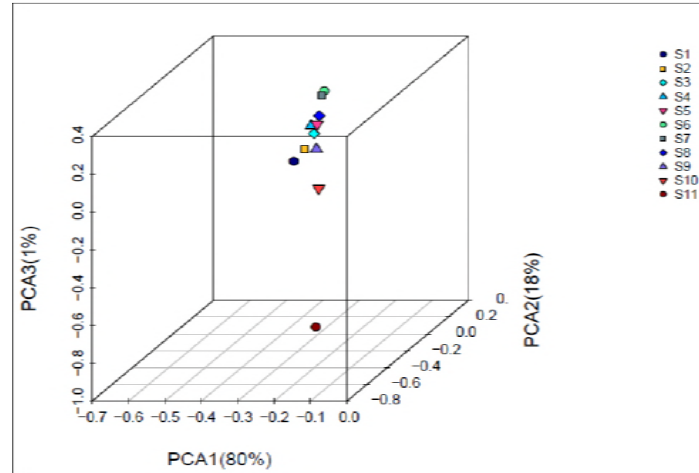

Figure 3 Principal coordinate analysis graphs of shrimp paste

Different colors represent different samples or different group samples in the graph, the higher the similarity between samples, the more likely to be aggregated in the graph.
